# Supplementary material for: Effect of Methyl Jasmonate Doped Nanoparticles on Nitrogen Composition of Monastrell Grapes and Wines
Source: MDPI journal article supplement (doi:10.3390/biom11111631), 2021-11-04
Supplement: s1 [file s1]

## Supplementary

**Table S1.** Abbreviations used in Table 3.

|                              |                                       |
|------------------------------|---------------------------------------|
| Asp                          | Aspartic acid                         |
| Glu                          | Glutamic acid                         |
| Asn + Ser                    | Asparagine+serine                     |
| Gln                          | Glutamine                             |
| His                          | Histidine                             |
| Gly                          | Glycine                               |
| Thr                          | Threonine                             |
| $\beta$ -Ala                 | $\beta$ -Alanine                      |
| Arg + GABA                   | Arginine+ $\gamma$ -aminobutyric acid |
| $\alpha$ -Ala                | $\alpha$ -Alanine                     |
| Pro                          | Proline                               |
| NH <sub>4</sub> <sup>+</sup> | Ammonium ion                          |
| Tyr                          | Tyrosine                              |
| Val                          | Valine                                |
| Met                          | Methionine                            |
| Cys                          | Cysteine                              |
| Iso                          | Isoleucine                            |
| Leu                          | Leucine                               |
| Trp                          | Tryptophan                            |
| Phe                          | Phenylalanine                         |
| Orn                          | Ornithine                             |
| Lys                          | Lysine                                |

**Table S2.** Percentage of variance attributable to treatment, season and interaction of the variables of each amino acid concentration in Monastrell musts.

|                              | Treatment | Season | T x S | Residual |
|------------------------------|-----------|--------|-------|----------|
| Asp                          | 4.48      | 92.18  | 3.00  | 0.35     |
| Glu                          | 10.60     | 86.53  | 2.16  | 0.71     |
| Asn + Ser                    | 49.98     | 36.04  | 11.36 | 2.62     |
| Gln                          | 25.02     | 69.99  | 3.16  | 1.82     |
| His                          | 18.91     | 80.12  | 0.97  | 2.38     |
| Gly                          | 15.55     | 79.46  | 4.99  | 2.70     |
| Thr                          | 32.11     | 51.94  | 15.95 | 3.38     |
| B-Ala                        | 38.47     | 57.23  | 4.30  | 4.37     |
| Arg + GABA                   | 59.55     | 36.80  | 3.65  | 2.03     |
| $\alpha$ -Ala                | 2.38      | 96.00  | 1.62  | 0.46     |
| Pro                          | 71.06     | 3.50   | 25.44 | 1.26     |
| NH <sub>4</sub> <sup>+</sup> | 78.20     | 0.45   | 21.34 | 6.73     |
| Tyr                          | 7.80      | 90.03  | 2.17  | 1.29     |
| Val                          | 5.89      | 89.57  | 4.54  | 1.33     |
| Met                          | 15.78     | 77.43  | 6.79  | 9.02     |
| Cys                          | 52.46     | 26.43  | 0.49  | 20.62    |
| Iso                          | 6.62      | 82.78  | 8.39  | 2.21     |
| Leu                          | 6.58      | 87.28  | 6.13  | 1.77     |
| Trp                          | 29.78     | 62.38  | 4.60  | 3.24     |
| Phe                          | 11.68     | 72.09  | 10.98 | 5.26     |

|             |       |       |       |      |
|-------------|-------|-------|-------|------|
| Orn         | 67.22 | 3.09  | 26.27 | 3.42 |
| Lys         | 78.81 | 0.40  | 14.38 | 6.41 |
| Pro/Arg     | 36.73 | 35.03 | 26.07 | 2.17 |
| Totales     | 49.45 | 44.83 | 5.73  | 1.66 |
| Totales-Pro | 27.58 | 70.83 | 1.60  | 1.47 |

**Table S3.** Percentage of variance attributable to treatment, season and interaction of the variables of each amino acid concentration in Monastrell wines.

|             | Treatment | Season | T x S | Residual |
|-------------|-----------|--------|-------|----------|
| Asp         | 66.40     | 26.02  | 2.60  | 4.98     |
| Glu         | 42.16     | 43.51  | 4.77  | 9.56     |
| Asn + Ser   | 32.54     | 62.46  | 0.06  | 4.94     |
| Gln         | 59.15     | 25.37  | 5.81  | 9.67     |
| His         | 28.95     | 64.58  | 6.47  | 14.94    |
| Gly         | 27.67     | 70.28  | 2.05  | 5.48     |
| Thr         | 22.68     | 69.78  | 7.55  | 6.21     |
| β-Ala       | 14.77     | 78.10  | 7.13  | 18.63    |
| Arg         | 22.51     | 70.51  | 6.98  | 3.85     |
| GABA        | 23.33     | 73.73  | 2.94  | 5.85     |
| Al          | 26.55     | 69.84  | 3.61  | 3.33     |
| Pro         | 31.48     | 67.32  | 1.19  | 5.46     |
| NH4+        | 19.53     | 63.51  | 16.97 | 5.43     |
| Tyr         | 34.79     | 52.01  | 13.19 | 2.47     |
| Val         | 41.14     | 49.81  | 9.05  | 15.66    |
| Met         | 27.77     | 33.52  | 3.23  | 35.49    |
| Cys         | 2.26      | 66.05  | 5.55  | 26.13    |
| Iso         | 28.45     | 67.22  | 4.33  | 23.92    |
| Leu         | 34.20     | 50.74  | 9.82  | 5.24     |
| Trp         | 32.25     | 58.56  | 4.06  | 5.13     |
| Phe         | 46.77     | 36.64  | 10.51 | 6.08     |
| Orn         | 19.75     | 71.08  | 5.60  | 3.57     |
| Lys         | 37.12     | 53.50  | 9.39  | 14.32    |
| Totales     | 31.46     | 67.17  | 1.37  | 5.30     |
| Totales-Pro | 31.70     | 64.22  | 4.08  | 5.49     |
